# Supplementary material
Source: publisher figshare collection journal article supplement (https://sage.figshare.com/ndownloader/files/17890220)
Supplement: Supplementary file 1 [file 17890220]

## Sheet: Title
Appendix B2. Values for example cases.

## Sheet: Figure 7
Case	Age	State	Estimate	Lower Bound	Upper Bound
White, Abstinent @ 25	Age 30	Abstinent	0.495548	0.448034	0.544966
Black, Abstinent @ 25	Age 30	Abstinent	0.695469	0.642904	0.745046
White, Very High Risk @ 25	Age 30	Abstinent	0.216067	0.172693	0.266693
Black, Very High Risk @ 25	Age 30	Abstinent	0.224637	0.171797	0.283771
White, Abstinent @ 25	Age 30	Low Risk	0.394317	0.349714	0.438521
Black, Abstinent @ 25	Age 30	Low Risk	0.223354	0.182615	0.264342
White, Very High Risk @ 25	Age 30	Low Risk	0.398425	0.327927	0.462105
Black, Very High Risk @ 25	Age 30	Low Risk	0.457563	0.398968	0.515643
White, Abstinent @ 25	Age 30	Medium Risk	0.0216049	0.0134021	0.0316804
Black, Abstinent @ 25	Age 30	Medium Risk	0.017772	0.0108033	0.0276753
White, Very High Risk @ 25	Age 30	Medium Risk	0.0739342	0.050763	0.102426
Black, Very High Risk @ 25	Age 30	Medium Risk	0.0630436	0.0430567	0.0857398
White, Abstinent @ 25	Age 30	High Risk	0.0347948	0.0244356	0.048359
Black, Abstinent @ 25	Age 30	High Risk	0.0228345	0.0149319	0.0324124
White, Very High Risk @ 25	Age 30	High Risk	0.105305	0.0776027	0.139766
Black, Very High Risk @ 25	Age 30	High Risk	0.07093	0.0503933	0.0936267
White, Abstinent @ 25	Age 30	Very High Risk	0.0537349	0.0389496	0.0702132
Black, Abstinent @ 25	Age 30	Very High Risk	0.0405707	0.0285708	0.0557349
White, Very High Risk @ 25	Age 30	Very High Risk	0.206268	0.159123	0.25812
Black, Very High Risk @ 25	Age 30	Very High Risk	0.183827	0.143391	0.234839
White, Abstinent @ 25	Age 35	Abstinent	0.346938	0.303703	0.392875
Black, Abstinent @ 25	Age 35	Abstinent	0.567967	0.507956	0.624535
White, Very High Risk @ 25	Age 35	Abstinent	0.290934	0.248906	0.337043
Black, Very High Risk @ 25	Age 35	Abstinent	0.337616	0.281446	0.392138
White, Abstinent @ 25	Age 35	Low Risk	0.439034	0.394636	0.485086
Black, Abstinent @ 25	Age 35	Low Risk	0.297866	0.255716	0.342763
White, Very High Risk @ 25	Age 35	Low Risk	0.408735	0.359399	0.458128
Black, Very High Risk @ 25	Age 35	Low Risk	0.419521	0.375254	0.468261
White, Abstinent @ 25	Age 35	Medium Risk	0.0489383	0.035589	0.0640575
Black, Abstinent @ 25	Age 35	Medium Risk	0.0314805	0.0226405	0.0422404
White, Very High Risk @ 25	Age 35	Medium Risk	0.0728199	0.0541551	0.0960359
Black, Very High Risk @ 25	Age 35	Medium Risk	0.0605805	0.0458722	0.0799564
White, Abstinent @ 25	Age 35	High Risk	0.0838781	0.0641835	0.106847
Black, Abstinent @ 25	Age 35	High Risk	0.046383	0.0341158	0.0617462
White, Very High Risk @ 25	Age 35	High Risk	0.110165	0.0846226	0.137866
Black, Very High Risk @ 25	Age 35	High Risk	0.0771804	0.0571843	0.100106
White, Abstinent @ 25	Age 35	Very High Risk	0.0812124	0.0624445	0.103184
Black, Abstinent @ 25	Age 35	Very High Risk	0.0563035	0.0416416	0.0734537
White, Very High Risk @ 25	Age 35	Very High Risk	0.117347	0.091539	0.149418
Black, Very High Risk @ 25	Age 35	Very High Risk	0.105102	0.0833211	0.133283
Case	Age	State	Estimate	Lower Bound	Upper Bound
White, Abstinent @ 25	Age 40	Abstinent	0.388241	0.342761	0.437348
Black, Abstinent @ 25	Age 40	Abstinent	0.595515	0.541799	0.646702
White, Very High Risk @ 25	Age 40	Abstinent	0.370993	0.325827	0.421551
Black, Very High Risk @ 25	Age 40	Abstinent	0.456836	0.402475	0.50855
White, Abstinent @ 25	Age 40	Low Risk	0.348437	0.296659	0.399732
Black, Abstinent @ 25	Age 40	Low Risk	0.24329	0.200036	0.292611
White, Very High Risk @ 25	Age 40	Low Risk	0.341994	0.288577	0.393303
Black, Very High Risk @ 25	Age 40	Low Risk	0.31531	0.267459	0.367632
White, Abstinent @ 25	Age 40	Medium Risk	0.0740535	0.0530253	0.0996031
Black, Abstinent @ 25	Age 40	Medium Risk	0.0273581	0.0192517	0.0375084
White, Very High Risk @ 25	Age 40	Medium Risk	0.0822981	0.0597632	0.111697
Black, Very High Risk @ 25	Age 40	Medium Risk	0.039477	0.0282439	0.0531498
White, Abstinent @ 25	Age 40	High Risk	0.0859064	0.0643483	0.110494
Black, Abstinent @ 25	Age 40	High Risk	0.0737963	0.0509233	0.0987293
White, Very High Risk @ 25	Age 40	High Risk	0.0914136	0.06882	0.11828
Black, Very High Risk @ 25	Age 40	High Risk	0.102299	0.0720284	0.136287
White, Abstinent @ 25	Age 40	Very High Risk	0.103362	0.0781423	0.129328
Black, Abstinent @ 25	Age 40	Very High Risk	0.0600405	0.0436192	0.079836
White, Very High Risk @ 25	Age 40	Very High Risk	0.113301	0.0863545	0.14237
Black, Very High Risk @ 25	Age 40	Very High Risk	0.0860773	0.0652964	0.113894
White, Abstinent @ 25	Age 45	Abstinent	0.439514	0.363983	0.509787
Black, Abstinent @ 25	Age 45	Abstinent	0.637209	0.566543	0.705432
White, Very High Risk @ 25	Age 45	Abstinent	0.432273	0.358823	0.503927
Black, Very High Risk @ 25	Age 45	Abstinent	0.55043	0.477218	0.621924
White, Abstinent @ 25	Age 45	Low Risk	0.309909	0.245567	0.373502
Black, Abstinent @ 25	Age 45	Low Risk	0.212537	0.162762	0.269645
White, Very High Risk @ 25	Age 45	Low Risk	0.309616	0.243833	0.374019
Black, Very High Risk @ 25	Age 45	Low Risk	0.255658	0.199734	0.318069
White, Abstinent @ 25	Age 45	Medium Risk	0.0718723	0.049312	0.1016
Black, Abstinent @ 25	Age 45	Medium Risk	0.0258175	0.0179347	0.0362925
White, Very High Risk @ 25	Age 45	Medium Risk	0.0744136	0.0514983	0.105829
Black, Very High Risk @ 25	Age 45	Medium Risk	0.033647	0.0235558	0.0458865
White, Abstinent @ 25	Age 45	High Risk	0.080037	0.0579196	0.104035
Black, Abstinent @ 25	Age 45	High Risk	0.067798	0.0437731	0.0972552
White, Very High Risk @ 25	Age 45	High Risk	0.0819155	0.0594054	0.1073
Black, Very High Risk @ 25	Age 45	High Risk	0.0866035	0.0566227	0.124822
White, Abstinent @ 25	Age 45	Very High Risk	0.0986684	0.0729586	0.127197
Black, Abstinent @ 25	Age 45	Very High Risk	0.0566383	0.040936	0.077101
White, Very High Risk @ 25	Age 45	Very High Risk	0.101782	0.0751612	0.131735
Black, Very High Risk @ 25	Age 45	Very High Risk	0.0736614	0.0545502	0.0994562
Case	Age	State	Estimate	Lower Bound	Upper Bound
White, Abstinent @ 25	Age 50	Abstinent	0.468385	0.378458	0.556124
Black, Abstinent @ 25	Age 50	Abstinent	0.6645	0.580523	0.749399
White, Very High Risk @ 25	Age 50	Abstinent	0.465034	0.37516	0.553592
Black, Very High Risk @ 25	Age 50	Abstinent	0.610425	0.521929	0.697832
White, Abstinent @ 25	Age 50	Low Risk	0.296887	0.228437	0.365045
Black, Abstinent @ 25	Age 50	Low Risk	0.198295	0.143037	0.263388
White, Very High Risk @ 25	Age 50	Low Risk	0.297347	0.228686	0.365214
Black, Very High Risk @ 25	Age 50	Low Risk	0.224967	0.165915	0.293196
White, Abstinent @ 25	Age 50	Medium Risk	0.0672481	0.0454995	0.0974619
Black, Abstinent @ 25	Age 50	Medium Risk	0.0235798	0.0154095	0.034759
White, Very High Risk @ 25	Age 50	Medium Risk	0.0681929	0.0460456	0.0993517
Black, Very High Risk @ 25	Age 50	Medium Risk	0.0285139	0.0193567	0.040602
White, Abstinent @ 25	Age 50	High Risk	0.0751377	0.0533828	0.0996598
Black, Abstinent @ 25	Age 50	High Risk	0.061937	0.0380014	0.0918223
White, Very High Risk @ 25	Age 50	High Risk	0.0758982	0.0537913	0.100802
Black, Very High Risk @ 25	Age 50	High Risk	0.0736922	0.0456182	0.109527
White, Abstinent @ 25	Age 50	Very High Risk	0.0923426	0.0672734	0.120954
Black, Abstinent @ 25	Age 50	Very High Risk	0.0516875	0.0363163	0.0721371
White, Very High Risk @ 25	Age 50	Very High Risk	0.0935277	0.0681375	0.122635
Black, Very High Risk @ 25	Age 50	Very High Risk	0.0624017	0.0449695	0.086196
White, Abstinent @ 25	Age 55	Abstinent	0.508948	0.432293	0.586935
Black, Abstinent @ 25	Age 55	Abstinent	0.66168	0.584319	0.732244
White, Very High Risk @ 25	Age 55	Abstinent	0.506924	0.430737	0.584159
Black, Very High Risk @ 25	Age 55	Abstinent	0.625332	0.548854	0.696414
White, Abstinent @ 25	Age 55	Low Risk	0.270807	0.213078	0.325249
Black, Abstinent @ 25	Age 55	Low Risk	0.213793	0.164228	0.263062
White, Very High Risk @ 25	Age 55	Low Risk	0.27139	0.213809	0.326668
Black, Very High Risk @ 25	Age 55	Low Risk	0.233311	0.18161	0.28636
White, Abstinent @ 25	Age 55	Medium Risk	0.065361	0.0468426	0.0885365
Black, Abstinent @ 25	Age 55	Medium Risk	0.0242414	0.0161445	0.0347872
White, Very High Risk @ 25	Age 55	Medium Risk	0.065821	0.0471918	0.0889171
Black, Very High Risk @ 25	Age 55	Medium Risk	0.027691	0.0190276	0.0395173
White, Abstinent @ 25	Age 55	High Risk	0.0673539	0.0488976	0.0908366
Black, Abstinent @ 25	Age 55	High Risk	0.0550358	0.0353408	0.080139
White, Very High Risk @ 25	Age 55	High Risk	0.0677524	0.0493336	0.0916992
Black, Very High Risk @ 25	Age 55	High Risk	0.062108	0.0407652	0.0888979
White, Abstinent @ 25	Age 55	Very High Risk	0.0875313	0.064724	0.114429
Black, Abstinent @ 25	Age 55	Very High Risk	0.0452488	0.0305704	0.063841
White, Very High Risk @ 25	Age 55	Very High Risk	0.0881126	0.0652465	0.115137
Black, Very High Risk @ 25	Age 55	Very High Risk	0.0515569	0.0355183	0.072033

## Sheet: Figure 8
Case	Age	State	Estimate	Lower Bound	Upper Bound
White, Abstinent @ 50	Age 55	Abstinent	0.868351	0.834769	0.897801
Black, Abstinent @ 50	Age 55	Abstinent	0.886468	0.852021	0.916297
White, Very High Risk @ 50	Age 55	Abstinent	0.312324	0.255868	0.371271
Black, Very High Risk @ 50	Age 55	Abstinent	0.335733	0.278288	0.395232
White, Abstinent @ 50	Age 55	Low Risk	0.063577	0.0468437	0.0855464
Black, Abstinent @ 50	Age 55	Low Risk	0.0583253	0.0414704	0.081024
White, Very High Risk @ 50	Age 55	Low Risk	0.182818	0.142805	0.226481
Black, Very High Risk @ 50	Age 55	Low Risk	0.275696	0.23025	0.326654
White, Abstinent @ 50	Age 55	Medium Risk	0.0295868	0.0185041	0.0456867
Black, Abstinent @ 50	Age 55	Medium Risk	0.0264855	0.0158041	0.0409568
White, Very High Risk @ 50	Age 55	Medium Risk	0.238192	0.186552	0.289843
Black, Very High Risk @ 50	Age 55	Medium Risk	0.155244	0.116787	0.199303
White, Abstinent @ 50	Age 55	High Risk	0.0130898	0.00904576	0.0183588
Black, Abstinent @ 50	Age 55	High Risk	0.00601048	0.00332278	0.00970201
White, Very High Risk @ 50	Age 55	High Risk	0.127099	0.095996	0.165012
Black, Very High Risk @ 50	Age 55	High Risk	0.112682	0.0793054	0.151259
White, Abstinent @ 50	Age 55	Very High Risk	0.025395	0.0158565	0.0380974
Black, Abstinent @ 50	Age 55	Very High Risk	0.0227109	0.0135962	0.0378718
White, Very High Risk @ 50	Age 55	Very High Risk	0.139567	0.103801	0.180075
Black, Very High Risk @ 50	Age 55	Very High Risk	0.120645	0.0922337	0.151783
White, Abstinent @ 50	Age 60	Abstinent	0.797595	0.7482	0.841804
Black, Abstinent @ 50	Age 60	Abstinent	0.81241	0.76122	0.861135
White, Very High Risk @ 50	Age 60	Abstinent	0.455827	0.393111	0.516254
Black, Very High Risk @ 50	Age 60	Abstinent	0.496874	0.437058	0.553061
White, Abstinent @ 50	Age 60	Low Risk	0.106548	0.0815389	0.138145
Black, Abstinent @ 50	Age 60	Low Risk	0.111823	0.0820007	0.143087
White, Very High Risk @ 50	Age 60	Low Risk	0.233896	0.193814	0.277095
Black, Very High Risk @ 50	Age 60	Low Risk	0.247831	0.21252	0.290094
White, Abstinent @ 50	Age 60	Medium Risk	0.0421508	0.0288126	0.0586751
Black, Abstinent @ 50	Age 60	Medium Risk	0.0284401	0.0184208	0.0420351
White, Very High Risk @ 50	Age 60	Medium Risk	0.144722	0.111116	0.188535
Black, Very High Risk @ 50	Age 60	Medium Risk	0.0846446	0.064254	0.110224
White, Abstinent @ 50	Age 60	High Risk	0.0281726	0.0194812	0.038614
Black, Abstinent @ 50	Age 60	High Risk	0.0259747	0.0170113	0.0368118
White, Very High Risk @ 50	Age 60	High Risk	0.084122	0.0637803	0.105312
Black, Very High Risk @ 50	Age 60	High Risk	0.1068	0.076342	0.142892
White, Abstinent @ 50	Age 60	Very High Risk	0.0255339	0.0170447	0.0358295
Black, Abstinent @ 50	Age 60	Very High Risk	0.0213526	0.0139038	0.0305201
White, Very High Risk @ 50	Age 60	Very High Risk	0.0814331	0.0591444	0.106422
Black, Very High Risk @ 50	Age 60	Very High Risk	0.0638501	0.0473057	0.0822812
Case	Age	State	Estimate	Lower Bound	Upper Bound
White, Abstinent @ 50	Age 65	Abstinent	0.775099	0.709061	0.828578
Black, Abstinent @ 50	Age 65	Abstinent	0.788817	0.716726	0.849882
White, Very High Risk @ 50	Age 65	Abstinent	0.561116	0.49133	0.627932
Black, Very High Risk @ 50	Age 65	Abstinent	0.591976	0.523721	0.657663
White, Abstinent @ 50	Age 65	Low Risk	0.1274	0.0911914	0.174001
Black, Abstinent @ 50	Age 65	Low Risk	0.126542	0.0880385	0.174248
White, Very High Risk @ 50	Age 65	Low Risk	0.21165	0.162245	0.26331
Black, Very High Risk @ 50	Age 65	Low Risk	0.21049	0.166539	0.261203
White, Abstinent @ 50	Age 65	Medium Risk	0.0413486	0.0282568	0.0576994
Black, Abstinent @ 50	Age 65	Medium Risk	0.0236269	0.0148349	0.0354377
White, Very High Risk @ 50	Age 65	Medium Risk	0.101953	0.073977	0.137819
Black, Very High Risk @ 50	Age 65	Medium Risk	0.055746	0.037754	0.0790466
White, Abstinent @ 50	Age 65	High Risk	0.0302674	0.0208274	0.0422927
Black, Abstinent @ 50	Age 65	High Risk	0.0393418	0.0238719	0.0594057
White, Very High Risk @ 50	Age 65	High Risk	0.0654509	0.0483729	0.0850592
Black, Very High Risk @ 50	Age 65	High Risk	0.0945632	0.0623271	0.142654
White, Abstinent @ 50	Age 65	Very High Risk	0.025885	0.0170773	0.0363708
Black, Abstinent @ 50	Age 65	Very High Risk	0.0216726	0.0133321	0.0317587
White, Very High Risk @ 50	Age 65	Very High Risk	0.0598297	0.042191	0.0811162
Black, Very High Risk @ 50	Age 65	Very High Risk	0.0472246	0.0326934	0.0639811

## Sheet: Figure 9
Case	Elapsed	State	Estimate	Lower Bound	Upper Bound
Male, Starting Age 25	5 Years Elapsed	Abstinent	0.216067	0.172693	0.266693
Female, Starting Age 25	5 Years Elapsed	Abstinent	0.367902	0.304337	0.432657
Male, Starting Age 50	5 Years Elapsed	Abstinent	0.177411	0.131375	0.229645
Female, Starting Age 50	5 Years Elapsed	Abstinent	0.312324	0.255868	0.371271
Male, Starting Age 25	5 Years Elapsed	Low Risk	0.398425	0.327927	0.462105
Female, Starting Age 25	5 Years Elapsed	Low Risk	0.305592	0.258307	0.351009
Male, Starting Age 50	5 Years Elapsed	Low Risk	0.26386	0.208382	0.324149
Female, Starting Age 50	5 Years Elapsed	Low Risk	0.182818	0.142805	0.226481
Male, Starting Age 25	5 Years Elapsed	Medium Risk	0.0739342	0.050763	0.102426
Female, Starting Age 25	5 Years Elapsed	Medium Risk	0.119891	0.0870707	0.162868
Male, Starting Age 50	5 Years Elapsed	Medium Risk	0.120332	0.0871225	0.164761
Female, Starting Age 50	5 Years Elapsed	Medium Risk	0.238192	0.186552	0.289843
Male, Starting Age 25	5 Years Elapsed	High Risk	0.105305	0.0776027	0.139766
Female, Starting Age 25	5 Years Elapsed	High Risk	0.0902929	0.0644406	0.119571
Male, Starting Age 50	5 Years Elapsed	High Risk	0.12966	0.0965652	0.167619
Female, Starting Age 50	5 Years Elapsed	High Risk	0.127099	0.095996	0.165012
Male, Starting Age 25	5 Years Elapsed	Very High Risk	0.206268	0.159123	0.25812
Female, Starting Age 25	5 Years Elapsed	Very High Risk	0.116322	0.0902634	0.145859
Male, Starting Age 50	5 Years Elapsed	Very High Risk	0.308737	0.244142	0.376535
Female, Starting Age 50	5 Years Elapsed	Very High Risk	0.139567	0.103801	0.180075
Male, Starting Age 25	10 Years Elapsed	Abstinent	0.290934	0.248906	0.337043
Female, Starting Age 25	10 Years Elapsed	Abstinent	0.436431	0.386552	0.480966
Male, Starting Age 50	10 Years Elapsed	Abstinent	0.341874	0.275662	0.412705
Female, Starting Age 50	10 Years Elapsed	Abstinent	0.455827	0.393111	0.516254
Male, Starting Age 25	10 Years Elapsed	Low Risk	0.408735	0.359399	0.458128
Female, Starting Age 25	10 Years Elapsed	Low Risk	0.345461	0.305537	0.384193
Male, Starting Age 50	10 Years Elapsed	Low Risk	0.279586	0.228597	0.336818
Female, Starting Age 50	10 Years Elapsed	Low Risk	0.233896	0.193814	0.277095
Male, Starting Age 25	10 Years Elapsed	Medium Risk	0.0728199	0.0541551	0.0960359
Female, Starting Age 25	10 Years Elapsed	Medium Risk	0.0736536	0.0548807	0.0953445
Male, Starting Age 50	10 Years Elapsed	Medium Risk	0.116972	0.0866953	0.149112
Female, Starting Age 50	10 Years Elapsed	Medium Risk	0.144722	0.111116	0.188535
Male, Starting Age 25	10 Years Elapsed	High Risk	0.110165	0.0846226	0.137866
Female, Starting Age 25	10 Years Elapsed	High Risk	0.0726581	0.0552831	0.0948843
Male, Starting Age 50	10 Years Elapsed	High Risk	0.106056	0.079952	0.138043
Female, Starting Age 50	10 Years Elapsed	High Risk	0.084122	0.0637803	0.105312
Male, Starting Age 25	10 Years Elapsed	Very High Risk	0.117347	0.091539	0.149418
Female, Starting Age 25	10 Years Elapsed	Very High Risk	0.0717962	0.0557964	0.0888445
Male, Starting Age 50	10 Years Elapsed	Very High Risk	0.155512	0.119008	0.195291
Female, Starting Age 50	10 Years Elapsed	Very High Risk	0.0814331	0.0591444	0.106422
Case	Elapsed	State	Estimate	Lower Bound	Upper Bound
Male, Starting Age 25	15 Years Elapsed	Abstinent	0.370993	0.325827	0.421551
Female, Starting Age 25	15 Years Elapsed	Abstinent	0.563525	0.514854	0.612715
Male, Starting Age 50	15 Years Elapsed	Abstinent	0.438768	0.363549	0.519542
Female, Starting Age 50	15 Years Elapsed	Abstinent	0.561116	0.49133	0.627932
Male, Starting Age 25	15 Years Elapsed	Low Risk	0.341994	0.288577	0.393303
Female, Starting Age 25	15 Years Elapsed	Low Risk	0.206447	0.169938	0.244819
Male, Starting Age 50	15 Years Elapsed	Low Risk	0.280326	0.218409	0.342982
Female, Starting Age 50	15 Years Elapsed	Low Risk	0.21165	0.162245	0.26331
Male, Starting Age 25	15 Years Elapsed	Medium Risk	0.0822981	0.0597632	0.111697
Female, Starting Age 25	15 Years Elapsed	Medium Risk	0.0941284	0.0713636	0.120295
Male, Starting Age 50	15 Years Elapsed	Medium Risk	0.0852838	0.0599376	0.117758
Female, Starting Age 50	15 Years Elapsed	Medium Risk	0.101953	0.073977	0.137819
Male, Starting Age 25	15 Years Elapsed	High Risk	0.0914136	0.06882	0.11828
Female, Starting Age 25	15 Years Elapsed	High Risk	0.0612445	0.0449843	0.0798065
Male, Starting Age 50	15 Years Elapsed	High Risk	0.0835149	0.0595509	0.114328
Female, Starting Age 50	15 Years Elapsed	High Risk	0.0654509	0.0483729	0.0850592
Male, Starting Age 25	15 Years Elapsed	Very High Risk	0.113301	0.0863545	0.14237
Female, Starting Age 25	15 Years Elapsed	Very High Risk	0.074655	0.0585538	0.0943963
Male, Starting Age 50	15 Years Elapsed	Very High Risk	0.112107	0.0832168	0.146252
Female, Starting Age 50	15 Years Elapsed	Very High Risk	0.0598297	0.042191	0.0811162
